# Fate mapping analysis reveals a novel dermal migratory Langerhans-like cell population

Jianpeng Sheng<sup>1,2\*</sup>, Chen Qi<sup>2</sup>, Dong Yu Wen<sup>2</sup>, Wu Xiaoting<sup>2</sup>, Johannes Mayer<sup>3</sup>, Wang Lin<sup>1</sup>,  
Bai Xueli<sup>1</sup>, Liang Tingbo<sup>1</sup>, Sung Yang Ho<sup>2</sup>, Wilson Wen Bin Goh<sup>2</sup>, Franca Ronchese<sup>3</sup> and  
Christiane Ruedl<sup>2\*#</sup>

<sup>1</sup> Zhejiang Provincial Key Laboratory of Pancreatic Disease, The First Affiliated Hospital,  
Zhejiang University School of Medicine, Hangzhou, China; <sup>2</sup> Nanyang Technological  
University, School of Biological Sciences, 60 Nanyang Drive, Singapore 637551; <sup>3</sup>  
Malaghan Institute of Medical Research, Wellington 6012, New Zealand.

\* Corresponding authors

# Lead contact: Christiane Ruedl, School of Biological Sciences, Nanyang Technological  
University, 60 Nanyang Drive, Singapore 637551. e-mail: [Ruedl@ntu.edu.sg](mailto:Ruedl@ntu.edu.sg)

**Running title:** Migratory dermal Langerhans-like cells

**Key words:** Langerhans cells, dermal dendritic cells, radio-resistance, long-lived, turn-over  
kinetics, migration.

26 **Abstract**

27 Dendritic cells residing in the skin represent a large family of antigen presenting cells,  
28 ranging from long-lived Langerhans cells (LC) in the epidermis to various distinct classical  
29 dendritic cell subsets in the dermis. Through genetic fate mapping analysis and single cell  
30 RNA sequencing we have identified a novel separate population of LC-independent  
31 CD207<sup>+</sup>CD326<sup>+</sup> LC<sup>like</sup> cells in the dermis that homed at a slow rate to the LNs. These LC<sup>like</sup>  
32 cells were long-lived and radioresistant but, unlike LCs, they were gradually replenished by  
33 bone-marrow-derived precursors under steady state. LC<sup>like</sup> cells together with cDC1s were  
34 the main migratory CD207<sup>+</sup>CD326<sup>+</sup> cell fractions present in the LN and not, as currently  
35 assumed, LCs, which were barely detectable, if at all. These findings bring new insights into  
36 the dynamism of cutaneous dendritic cells and opens novel avenues in the development of  
37 treatments to cure inflammatory skin disorders.

38

39

40

41

42

## 43 **Introduction**

44

45 In 1868, Paul Langerhans described a novel dendritic-shaped, non-pigmentary cell  
46 population in the epidermis (Langerhans, 1868). These so-called Langerhans cells (LCs)  
47 were first classified as cellular members of the nervous system, due to their morphological  
48 similarity with neurons. It was not until the 1980s when it became clear that this peculiar  
49 epidermal cell fraction with its potent antigen presentation activity belonged to the dendritic  
50 cell (DC) family (Romani and Schuler, 1989; Schuler and Steinman, 1985). Despite the fact  
51 that LCs share many features with DCs, they are generally considered as epidermal  
52 tissue-resident macrophages, mainly due to their dependence on CSF1, their embryonic  
53 origin and local self-maintenance (Wynn et al., 2013), although a conventional  
54 “macrophage signature” (e.g. CD16/32, CD64 and MerTK expression) is missing (Gautier  
55 et al., 2012).

56 LCs can sense invading pathogens and initiate an intrinsic maturation process that drives  
57 their migration out of the epidermis (Romani et al., 2001). As such, LCs have been  
58 regarded as a prototype antigen presenting cell (APC) (Nagao et al., 2009) that can, after  
59 antigen capture, migrate to the draining lymph nodes (LNs) to initiate an immune response  
60 by priming naïve LN-resident T cells (Romani et al., 2003). Antigen presentation can,  
61 however, occur in skin-draining LNs independently of LCs (Henri et al., 2010). In fact, the  
62 skin hosts several other distinct dermal DC subpopulations (Henri et al., 2010;  
63 Kissenpfennig et al., 2005), the presence of which complicates the analysis of the cellular  
64 contribution to skin immune responses, such as contact hypersensitivity (CHS).  
65 Consequently, the paradigm of “who is doing what” (i.e. epidermal LCs versus dermal DC  
66 counterparts) is still controversial (Bennett et al., 2005; Bobr et al., 2010; Bursch et al.,  
67 2007; Clausen and Stoitzner, 2015; Kaplan et al., 2005; Noordegraaf et al., 2010; West and  
68 Bennett, 2017).

69 Here we demonstrate that under steady-state conditions LCs most likely do not exit the skin,  
70 or if so, in very low numbers. Through a combined use of genetic fate mapping and novel  
71 inducible LC ablating mouse models, we show that the originally described LN LC fraction

72 is actually an independent LC<sup>like</sup> cell population that originates from the dermis, not from the  
73 epidermis. These LC<sup>like</sup> cells are ontogenitically different from LCs and are replaced over  
74 time by BM-derived cells with slow kinetics before trafficking to the LN.

75

76

## 77 **Results**

78

### 79 **LC<sup>like</sup> cells are found in dermis and LNs**

80 The skin and the skin-draining LNs contain several distinct dendritic cell subpopulations.  
81 To delineate migratory LCs and dermal DCs, we profiled DC subsets in the epidermis,  
82 dermis and skin-draining LNs. In the epidermis, we confirmed that CD326<sup>+</sup>CD207<sup>+</sup> LCs are  
83 predominantly found within the CD11b<sup>hi</sup>F4/80<sup>hi</sup> fraction (Nagao et al., 2009; Valladeau et al.,  
84 2000) (Fig. 1A). In the dermis, we found a fraction of CD11b<sup>hi</sup>F4/80<sup>hi</sup> cells that  
85 co-expressed CD326 and CD207 (Fig. 1B, upper panel). These cells could be immigrated  
86 LCs, although we can't exclude a contamination from the epidermis during the isolation  
87 procedure. As expected, the remaining dermal CD11b<sup>hi</sup>F4/80<sup>hi</sup> cells were CD326<sup>-</sup>CD207<sup>-</sup>  
88 tissue-resident macrophages (Sheng et al., 2015; Tamoutounour et al., 2013). Dermal DCs  
89 were localized in the F4/80<sup>int</sup> and CD11c<sup>hi</sup>MHCII<sup>+</sup> DC fraction, which we could separate into  
90 three subpopulations based on CD103 and CD11b expression: CD103<sup>+</sup>CD11b<sup>-</sup> (defined as  
91 cDC1), CD103<sup>-</sup>CD11b<sup>low</sup> and CD103<sup>-</sup>CD11b<sup>hi</sup> (defined as CD11b<sup>hi</sup>). CD103<sup>+</sup>CD11b<sup>-</sup> DCs  
92 but not CD103<sup>-</sup>CD11b<sup>hi</sup> DCs co-expressed CD326 and CD207. We could also divide the  
93 CD103<sup>-</sup>CD11b<sup>low</sup> subpopulation into CD326<sup>-</sup>CD207<sup>-</sup> (defined as Triple negative -TN) and  
94 CD326<sup>+</sup>CD207<sup>+</sup> (defined as LC<sup>like</sup>) fractions (Fig. 1B, right panel). To track the  
95 corresponding migratory DCs in the skin-draining LNs, we first gated on CD11c<sup>int-hi</sup>MHCII<sup>hi</sup>  
96 cells, which represent the migratory DC fraction (Sheng et al., 2017). Similar to our findings  
97 in the dermis, CD11b and CD103 labelling separated the migratory DCs into  
98 CD103<sup>+</sup>CD11b<sup>-</sup> (cDC1), CD103<sup>-</sup>CD11b<sup>hi</sup> (CD11b<sup>hi</sup>) and CD103<sup>-</sup>CD11b<sup>low</sup> cells (Fig.1C).  
99 The CD103<sup>-</sup>CD11b<sup>low</sup> cells could be further separated in two fractions: CD326<sup>-</sup>CD207<sup>-</sup> (TN)

100 and CD326<sup>+</sup>CD207<sup>+</sup> (LC<sup>like</sup>) subpopulations (Fig. 1C). Notably, we did not detect the *bona*  
101 *fide* epidermal and dermal LCs showing the original F4/80<sup>hi</sup>CD11b<sup>hi</sup> phenotype in the LN  
102 (Fig. 1C, right, lower panel). In agreement with previous work (Henri et al, 2010), the  
103 CD11b<sup>hi</sup> DC fraction represented the largest DC subpopulation in the dermis, whereas in  
104 the LN all four DC subpopulations (CD11b<sup>hi</sup>, cDC1, TN and LC<sup>like</sup>) were almost equally  
105 represented (Fig. 1D). Because we detected no phenotypic F4/80<sup>hi</sup> LCs in the LNs, we  
106 hypothesized that the cutaneous DCs en route to the LN were not derived from epidermal  
107 LCs, but rather from distinct dermal CD11b<sup>hi</sup>, cDC1, TN and F4/80<sup>low</sup> LC<sup>like</sup> DC  
108 populations. This analysis can't exclude, however, the possibility that the migrating LCs  
109 might change their phenotype.

110

### 111 **Single cell RNAseq confirms the presence of two independent LC and LC<sup>like</sup> cell** 112 **populations in the dermis**

113 Since LC and LC<sup>like</sup> cells co-exist together in the dermis, we aimed to investigate their  
114 relationship and respective gene signature by scRNAseq analysis. Unsupervised clustering  
115 and uniform manifold approximation and projection (UMAP) projections were performed on  
116 9605 enriched cells isolated from the dermis of ears obtained from 5 mice. The origin of  
117 distinct CD45<sup>+</sup> and CD45<sup>-</sup> dermal cell subpopulations are visualized in a color-coded UMAP  
118 plot (Fig. 2A). Nine different cell clusters could be broadly identified by unsupervised  
119 clustering and classified as follows: (1) LC, (2) LC<sup>like</sup>, (3) Mast cells/neutrophils, (4)  
120 DC/monocytes, (5) macrophages, (6) lymphocytes 1, (7) lymphocytes 2, (8) mesenchymal  
121 cells and (9) epithelial cells. Conventional DCs, monocyte and other myeloid related  
122 signature genes, such as *zbtb46* (DCs), *xcr1* and *clec9A* (cDC1), *siglec H* (plasmacytoid  
123 DC), *ly6c* and *ccr2* (monocytes), *gata2* and *Fcεrl* (mast cells) and *ly6g* (neutrophils) are  
124 mainly detectable in the DC/mono and mast cell/neutrophil clusters (3-4) and are mainly  
125 absent or weakly expressed in the LC/LC<sup>like</sup> clusters (1-2) (Fig. 2B, C and Fig. S1). *cd207*  
126 and *cd326* expressing cells are detected in LC (1), LC<sup>like</sup> (2) as well as in DC/monocyte  
127 cluster (4) which confirms the presence of three distinct CD207<sup>+</sup>CD326<sup>+</sup> dermal

128 subpopulations observed by flow cytometry (Fig. 1B). *Cd207 cd326* expressing cells  
129 detected in the cluster 4 are co-expressing *clec9A*, *xcr1*, *irf8* hence they represent the  
130 cDC1s (Fig. 2B and Fig. S1). *Cd207 cd326* expressing cells in clusters 1 (LC) and 2 (LC<sup>like</sup>)  
131 share many of previously reported LC signature genes (e.g. *cd11c*, *f4/80*, *cd74*, *mafb*, *spi1*,  
132 *csf1r*, *tgfbr1*) (Fig. 2C and Fig. S1), but several other genes are differentially expressed in  
133 LC<sup>like</sup> cells (e.g. *tgfbr2*, *sylt3*, *col27a1*, *fernt2*, *spry2*) or in LC cells (e.g. *cd209a*, *agpat4*,  
134 *birc3*, *dusp16*, *gdgd3*, *ly75* and *ppfibp2*), respectively (Fig. 2C, D). In summary, the  
135 unsupervised clustering of single cells obtained from dermis suggests that LC and LC<sup>like</sup>  
136 cells are two independent cell fractions and distinct from CD207<sup>+</sup>EpCAM<sup>+</sup> cDC1s as  
137 already shown in conventional flow cytometry analysis (Fig 1B).

138  
139

#### 140 **Early yolk sac precursors contribute to the development of LC but not LC<sup>like</sup> cells**

141

142 Fate mapping experiments have shown that epidermal LCs derived partially from primitive  
143 yolk sac progenitors (Hoeffel et al., 2012, Sheng et al., 2015), therefore the developmental  
144 origin of LCs is distinct from conventional DCs and resembled more microglia. To study in  
145 detail a possible yolk sac origin of distinct cutaneous LC and DC subpopulations, a single  
146 injection of TAM was given to E7.5 pregnant *Kit*<sup>MerCreMer/R26</sup> mice (Fig. 3A). Three months  
147 later the epidermis, dermis and brain (microglia as positive control) were collected and  
148 isolated cells were then analysed for YFP expression. As previously reported, microglia, the  
149 prototype yolk sac derived macrophage, were strongly labeled (~40%) (Fig. 3B, E).  
150 However, about 12 % of epidermal LCs were YFP labelled, confirming their partial yolk sac  
151 origin (Fig. 3C, E). In comparison, the dermal LC counterparts showed a similar labeling  
152 profile (~10%), whereas the remaining dermal DC subpopulations (LC<sup>like</sup>, cDC1,  
153 CD11b<sup>hi</sup> and TN) showed a significantly lower 5% YFP signal, very likely, attributed to small  
154 spill over of labeling in the HSCs (Fig. 3D, E). Therefore, YS only contributed to LCs but  
155 not to LC<sup>like</sup> cells.

156

157

158 **LC<sup>like</sup> DCs exhibit dual origins**

159 LCs are the only cell type from the DC family that originate from  
160 self-renewing radio-resistant embryonic precursors (Merad et al., 2002); other DC  
161 subpopulations are short-lived and constantly replenished by BM-progenitors<sup>23</sup>. To  
162 delineate the radioresistant properties of the newly identified LC<sup>like</sup> cells, we generated  
163 bone marrow (BM) chimeric mice by transplanting congenic CD45.1<sup>+</sup> mouse BM cells into  
164 irradiated CD45.2<sup>+</sup> recipients (Fig. 4A). We then analysed the CD45.1<sup>+</sup>/CD45.2<sup>+</sup> ratio in  
165 different skin-related DC subpopulations 1 or 4 months after reconstitution.

166

167 In the epidermis and dermis, LCs were mostly CD45.2<sup>+</sup>, and thus retained their host origins  
168 due to local self-renewal (Fig. 4B, C). By contrast, dermal cDC1, TN and CD11b<sup>hi</sup> DCs  
169 exhibited a wholly CD45.1<sup>+</sup> phenotype after just 1 month following reconstitution; this  
170 finding means that they are fully BM-derived. Only LC<sup>like</sup> cells showed a mixed contribution  
171 from both CD45.2<sup>+</sup> host and CD45.1<sup>+</sup> donor cells. In fact, after 1 month following  
172 reconstitution, only a minority (~10%) of LC<sup>like</sup> cells were replenished by CD45.1<sup>+</sup> cells; this  
173 percentage increased to ~50% by 4 months after reconstitution (Fig. 4B, C).

174

175 In skin-draining LNs, we found that cDC1, TN and CD11b<sup>hi</sup> cells were mostly derived from  
176 donor CD45.1<sup>+</sup> BM cells, excluding their origins from the radio-resistant LC population.  
177 Comparable to its dermal counterpart, only the LC<sup>like</sup> cell fraction was split into donor  
178 CD45.1<sup>+</sup> and host CD45.2<sup>+</sup> cells, respectively (Fig. 4B, C). In addition, the contribution of  
179 CD45.1<sup>+</sup> donor cells increased over time, from ~10% after 1 month to ~45% after 4 months.  
180 This unique temporal replacement suggests a dual origin for LC<sup>like</sup> cells, distinguishing this  
181 DC fraction from both conventional long-lived radio-resistant self-renewing LCs and  
182 short-lived BM-derived DCs.

183

184 To allow high resolution and unbiased data-driven dissection of skin DC subpopulations in  
185 the reconstituted chimeric mice, we performed a Uniform Manifold Approximation and  
186 Projection (UMAP) analysis of flow cytometry data. Both CD45.1<sup>+</sup> and CD45.2<sup>+</sup> LC<sup>like</sup> cells  
187 were clearly visible and clustered separately but in close proximity (Fig. 4D). Using this  
188 dimensional reduction algorithm, we detected that CD11c<sup>+</sup>MHCII<sup>hi</sup> dermal dendritic cell  
189 subpopulations could be grouped into five separate clusters: cDC1, TN, CD11b<sup>hi</sup> and two  
190 LC<sup>like</sup> cell clusters (BM-derived CD45.1<sup>+</sup> and resident CD45.2<sup>+</sup>). To investigate the  
191 molecular relationship between the resident LC<sup>like</sup> cell population and the BM-derived LC<sup>like</sup>  
192 cells, we performed RNA-sequencing on LN LC<sup>like</sup> cells isolated from chimeric mice  
193 (CD45.1<sup>+</sup> donor BM cells into CD45.2<sup>+</sup> recipient mice). Unsupervised hierarchical clustering  
194 (Euclidean Distance, Complete linkage) and Principle Component Analysis (PCA) analysis  
195 revealed that both CD45.1<sup>+</sup> and CD45.2<sup>+</sup> LC<sup>like</sup> cells clustered closely together (not shown),  
196 with ~85 % of their gene expression overlapping (Fig. 4E). The high level of similarity  
197 between resident and BM-derived LC<sup>like</sup> fractions indicates that the microenvironment and  
198 not the cellular origin, seems to determine the LC<sup>like</sup> cell identity.

199

## 200 **LC<sup>like</sup> cells display slow turnover kinetics**

201 BM chimeras require full body irradiation, which can damage the local skin  
202 micro-environment and attract BM-derived newcomers. This irradiation could, therefore,  
203 complicate the analysis of skin resident cell homeostatic turnover kinetics. To circumvent  
204 this issue, we performed a fate-mapping study under steady state conditions using  
205 *Kit*<sup>MerCreMer/R26</sup> fate mapping mice. These mice allow for the turnover rates of cell populations  
206 derived from BM precursors to be estimated (Sheng et al., 2015). We performed our  
207 analyses at different time points (1, 4 and 8 months) after TAM injection to ensure a  
208 sufficiently long time-frame to monitor populations that turn over slowly (Fig. 5A).

209

210 In the epidermis, LCs showed minimal YFP labelling over the entire 8-month chase period;  
211 this finding was expected as these cells are not replaced by BM-derived cells. (Fig. 5B and



212 C, left panel). Similarly in the dermis, CD11b<sup>hi</sup>F4/80<sup>hi</sup>CD326<sup>+</sup>CD207<sup>+</sup> cells showed minimal  
213 labelling from 1 to 8 months (Fig. 5B and C, middle panel). We propose that this fraction  
214 most likely represents immigrant LCs in the dermis. cDC1, TN and CD11b<sup>hi</sup> DCs, however,  
215 were fully labelled with YFP after just 1 month and the labelling was maintained for the  
216 remaining 8 months. This finding is consistent with the fast turnover rate identified for these  
217 three DC subsets. By contrast, LC<sup>like</sup> cells gradually accumulated the label from 10 to 60%  
218 over the 8-month chase period, supporting that dermis-resident LC<sup>like</sup> DCs are replaced  
219 slowly by BM progenitors. In the skin-draining LNs, all DC subsets behaved similarly to their  
220 dermal counterparts (Fig. 5B and C, right panel). Briefly, cDC1, TN and CD11b<sup>hi</sup> DCs  
221 showed a fast turnover by reaching plateau level of labelling after 1 month while LC<sup>like</sup> cells  
222 demonstrated a slow turnover rate over the 8-month chase period.

223

#### 224 **LC<sup>like</sup> cells are not derived from classical LCs**

225 To interrogate the relationship between LC and LC<sup>like</sup> cells, we exploited a novel  
226 DC-SIGN-DTR transgenic mouse strain (Fig. S2 A). which allowed us to deplete epidermal  
227 and dermal LCs without affecting the LC<sup>like</sup> cell pool and other immune cells types (Fig. 6  
228 and Fig. S2B). In fact, we detected DC-SIGN (or CD209a) by qPCR in murine LCs and in  
229 CD11b<sup>hi</sup> DCs but not in cDC1, TN or LC<sup>like</sup> cells (Fig. S2 C), a result which was  
230 corroborated by the scRNA analysis (Fig. 2). We established short and long depletion  
231 protocols (Fig. 6A) to capture even potentially very slowly migrating “LC-derivatives”  
232 (Bursch et al., 2007). In the DT-treated DC-SIGN DTR mice, LCs were efficiently depleted  
233 in both the epidermis and dermis by the short-term and long-term depletion protocols (Fig.  
234 6 A-C, Fig. S2D). We also found that cells in the CD11b<sup>hi</sup> cell fraction were affected by the  
235 DT treatment; this was particularly evident during the short-term depletion protocol, in  
236 which the cell numbers were reduced by ~80 % (Fig. 6B, C). Importantly, cDC1, TN and  
237 LC<sup>like</sup> cell numbers were unaffected and thus were comparable between DT-injected WT  
238 and DC-SIGN mouse strains. These results strongly support the independency of LC<sup>like</sup>  
239 cells from classical *bona fide* epidermal LCs.

240

241 To further confirm that LC<sup>like</sup> cells represent a distinct cell lineage from LCs, we crossed  
242 DC-SIGN DTR mice with a *Kit*<sup>Mercremer/R26</sup> fate mapping mouse, which would enable us to  
243 trace BM-derived cells in absence of LC. We treated these mice (DC-SIGN  
244 DTR-*Kit*<sup>Mercremer/R26</sup>) with TAM and then injected them with DT for 5 weeks to maintain  
245 long-term LC depletion (Fig. 7A). Although epidermal LCs were absent over the whole  
246 period, the YFP labelling profiles of skin-derived LN DC subsets, including the LC<sup>like</sup> fraction,  
247 were comparable between DT-injected DC-SIGN DTR<sup>+</sup>-*Kit*<sup>Mercremer/R26</sup> and DC-SIGN  
248 DTR<sup>neg</sup>-*Kit*<sup>Mercremer/R26</sup> mice (Fig. 7B, C). These data show that in absence of LC the  
249 replenishment of LC<sup>like</sup> cells by BM-derived cells is not affected.

250

251

## 252 Discussion

253 Epidermal Langerhans cells (LCs) are the only antigen presenting cells localized in the  
254 epidermis. These cells were recently re-defined as “macrophages in dendritic cell clothing”  
255 due to their unique ontogeny, and self-renewing and radioresistant characteristics (Doebel  
256 et al., 2017). By contrast, there are multiple DC and macrophage subpopulations that  
257 reside in the dermis (Tamoutounour et al., 2013). Although these dermal DCs share some  
258 common markers with LCs [such as langerin (CD207) and EpCaM (CD326)], they  
259 constitute a distinct cell lineage on the basis of their developmental origins and cytokine  
260 requirements (Bursch et al., 2007; Ginhoux et al., 2007; Poulin et al., 2007). Three CD207<sup>+</sup>  
261 DC subpopulations have been described in the skin-draining LN: two subpopulations are  
262 skin-derived and one subpopulation originates from the BM (Bursch et al., 2007; Douillard  
263 et al., 2005; Henri et al., 2001; Romani et al., 2010). Due to this diverse skin-resident DC  
264 network, it became evident that not only LCs, but other skin-derived DCs might be involved  
265 either in tolerance or immune response induction in draining LNs.

266 Although it is commonly believed that the journey of a LC starts from the epidermis and  
267 ends in the skin-draining LN after a transit through the dermis in steady state, we found that  
268 it is in-fact their look-alike counterparts, LC<sup>like</sup> cells, that migrate to the draining LNs. Our  
269 new insight was gained by re-analysing established mouse strains (*Kit*<sup>MerCreMer/R26</sup> mice) and  
270 exploiting newly generated transgenic mouse strains (DC-SIGN-DTR mice and  
271 DC-SIGN-DTR- *Kit*<sup>MerCreMer/R26</sup> fate mapping mice), which allowed us to visualize, with  
272 increasing resolution, the *in vivo* dynamics of skin-resident DCs under steady state. We first  
273 characterized and redefined different DC/LC subsets in the dermis by flow cytometry and  
274 scRNAseq analysis, which delineated classical F4/80<sup>hi</sup> LC and four different DC subsets,  
275 namely cDC1, TN DCs, CD11b<sup>hi</sup> DCs and an unappreciated CD11b<sup>low</sup>F4/80<sup>low</sup> LC<sup>like</sup> cell  
276 fraction. With the exception of classical F4/80<sup>hi</sup> LCs, we found all of these cells in the  
277 migratory CD11c<sup>int</sup>MHCII<sup>hi</sup> DC fraction of the skin-draining LN. This finding suggests that  
278 the majority of migratory CD326<sup>+</sup>CD207<sup>+</sup> DCs are CD103<sup>+</sup> cDC1 and CD103<sup>-</sup> LC<sup>like</sup> cells  
279 and not classical CD11b<sup>hi</sup>F4/80<sup>hi</sup> LCs which are hardly seen in the LN if not at all.

280 Corroborating evidence for differential migratory behaviours among different skin dendritic  
281 cells was provided by real-time intravital two-photon microscopy. Under steady-state  
282 conditions, due to the structural integrity of the basement membrane, epidermal LCs are  
283 sessile with static and almost immobile dendrites. In contrast, dermal DC subpopulations  
284 are actively crawling through the dermal interstitial space at high velocity even in absence  
285 of inflammation suggesting that continuous migration to LN is a steady-state property of  
286 dermal DCs and not epidermal LCs (Ng et al., 2008; Shklovskaya et al., 2010).

287 Our analysis of dermal DCs is in full agreement with Henri et al. who similarly to us  
288 disentangled the DC family in the dermis in five subpopulations: two subsets lacking the  
289 expression of CD207 (CD207<sup>-</sup>CD11b<sup>-</sup> [TN] and CD207<sup>-</sup>CD11b<sup>+</sup> [CD11b<sup>hi</sup>]) and three  
290 expressing CD207 (CD11b<sup>int</sup>CD207<sup>++</sup> mLCs, CD11b<sup>low/-</sup>CD207<sup>+</sup>CD103<sup>+</sup> [cDC1] and  
291 CD11b<sup>low</sup>CD207<sup>+</sup>CD103<sup>-</sup> [LC<sup>like</sup>]) (Henri et al., 2010).

292 Similarly, cutaneous LNs, were distinguished in five analogous subpopulations including  
293 mLCs, which were defined for their characteristics in radioresistance and not for the  
294 expression of classical LC markers (CD11b<sup>hi</sup> and F4/80<sup>hi</sup>). Henri et al. speculated that LN  
295 LCs downregulated CD11b and F4/80 expression (Henri et al., 2010) and therefore these  
296 markers lost their discriminatory power to segregate distinct CD207<sup>+</sup> cells in the LN.

297 To circumvent the “complication” of the potential shift in phenotype, we adopted an  
298 alternative approach based on genetic fate-mapping analyses which allowed to trace cell  
299 lineages between distinct LC and DC subpopulations avoiding lethal irradiation and  
300 generation of chimeric mice. First, our E7.5 embryo “labelling strategy” demonstrated that  
301 only LCs are partially yolk sac derived (Sheng et al, 2015), but not the other migratory DCs  
302 subpopulations, inclusive LC<sup>like</sup> cells. Second, our detailed analyses of the fate mapping  
303 kinetics revealed that the radioresistant and radiosensitive CD11b<sup>low</sup>CD207<sup>+</sup>CD103<sup>-</sup>  
304 subpopulations described by Henri et a. represented instead a truly homogeneous  
305 radioresistant LC<sup>like</sup> subpopulation, which is gradually replaced over time by BM-derived  
306 progenitors. Furthermore, we corroborated their “LC-independency”, since long-term  
307 absence of LCs did not affect the numbers of LC<sup>like</sup> cells in our DC-SIGN DTR mouse

308 model. Accordingly, our analysis delineated only four, and not five, LN migratory DC  
309 subpopulations, excluding LCs.

310 The phenotypes, transcription profiles and cytokine requirements of dermal cDC1, TN and  
311 CD11b<sup>hi</sup> DCs have been extensively described [reviewed in (Clausen and Stoitzner, 2015)];  
312 however, there has been comparatively less attention given to the LC<sup>like</sup> subpopulation.

313 Unsupervised clustering of scRNA-seq transcriptome data of dermal cells indicated that LC  
314 and LC<sup>like</sup> cells, although sharing some common myeloid cell markers, are two independent  
315 cell fractions and clearly distinct from macrophages and the other skin DC subpopulations.  
316 However, unlike LCs, which are BM-independent, radio-resistant and self-renewing (Ghigo  
317 et al., 2013; Hoeffel et al., 2012), LC<sup>like</sup> cells represent a radio-resistant population that is  
318 progressively replaced postnatally by BM-derived precursors. Similar to resident  
319 macrophages in tissues, such as skin, gut, kidney and heart, LC<sup>like</sup> cells have a dual origin  
320 involving both embryonic (but not yolk-sack like LCs) and adult haematopoiesis (Molawi et  
321 al., 2014; Sheng et al., 2015; Soncin et al., 2018). Unlike other skin DC subpopulations,  
322 which are short-lived and exhibit a high turnover rate, we show that fetal-derived LC<sup>like</sup> cells  
323 are long-lived and are replaced very slowly by BM-derived cells. These fetal-derived and  
324 BM-derived LC<sup>like</sup> cells co-exist together in adult tissue, and although derived from different  
325 origins, they show high similarity. This finding suggests that it is the local tissue  
326 microenvironment and not the cellular origin that shapes their final identity. The existence  
327 of a LC-independent radio-resistant dermal DC fraction was previously observed in other  
328 study that described the presence of an *in situ* proliferating, radio-resistant dermal DC  
329 subpopulation not only in the murine but also in human dermis (Bogunovic et al., 2006). It is  
330 likely that these cells are the LC<sup>like</sup> cells described here.

331 Although all dermal DCs migrate into LNs in a CCR7-dependent fashion (Forster et al.,  
332 1999), LC<sup>like</sup> cells seem to migrate at slower rate than other DCs under steady state  
333 conditions. Similar slow trafficking dynamics was originally attributed to LCs (Bursch et al.,  
334 2007; Ruedl et al., 2000) but we now strongly believe that these previously reported slow  
335 migratory cells are in fact LC<sup>like</sup> cells.

336 To further rule out the possibility that epidermal F4/80<sup>hi</sup>CD11b<sup>hi</sup> LC downregulate CD11b  
337 and F4/80 and turn into F4/80<sup>low</sup>CD11b<sup>low</sup> LC<sup>like</sup> cells in the dermis, we exploited a novel  
338 DC-SIGN DTR transgenic mouse strain where LCs, but not LC<sup>like</sup> cells, could be ablated.  
339 Even long-term depletion (6 weeks) of epidermal and dermal LCs had no effect on the  
340 numbers of LC<sup>like</sup> cells in the dermis and LNs while maintaining their LC<sup>like</sup> YFP-labeling  
341 profile in the absence of epidermal LCs in DC-SIGN DTR-*Kit*<sup>Mercremer/R26</sup> mice.

342

343 In summary, our genetic fate-mapping approach, used to delineate the complex skin DC  
344 network, does not support the established paradigm of LCs as being the main “prototype”  
345 migrating APCs to draining LNs under homeostatic conditions (Wilson and Villadangos,  
346 2004). We propose, rather, that LCs at steady state, similar to other tissue-resident  
347 macrophages, are sessile and act locally in the skin, whereas dermal LC<sup>like</sup> cells assume  
348 many of the functions previously attributed to LCs. The identification of this novel migratory  
349 dermal LC<sup>like</sup> subpopulation opens new avenues and approaches in the development of  
350 treatments to cure diseases such as contact allergic dermatitis and other inflammatory skin  
351 disorders like psoriasis.

352

353

354

355

## 356 **Material and Methods**

### 357 **Mice**

358 C57BL/6J and B6.SJL-*Ptprc<sup>a</sup> Pepc<sup>b</sup>*/BoyJ (B6 CD45.1) were obtained from The  
359 Jackson Laboratory (USA). *Kit<sup>MerCreMer/Rosa26-LSL-eYFP</sup>* (called *Kit<sup>MerCreMer/R26</sup>*) mice were  
360 generated as previously described ((Piva et al., 2012; Sheng et al., 2015). *Kit<sup>MerCreMer/R26</sup>*  
361 mice were backcrossed with DC-SIGN-DTR mice to obtain DC-SIGN-DTR-*Kit<sup>MerCreMer/R26</sup>*  
362 mice.

363 DC-SIGN DTR mice were generated as follows: the IRES-DTR fusion gene was inserted  
364 into the 3'-UTR region of the DC-SIGN gene locus on BAC RP24-306K4; the gene targeting  
365 vector was then retrieved from the modified BAC (Fig. S2A). The gene targeting vector was  
366 linearized and electroporated into Balb/C embryonic stem (ES) cells and correctly  
367 recombined ES colonies were selected by PCR. Gene targeted ES cells were injected into  
368 C57BL/6 blastocysts and transferred into the oviduct of a pseudo-pregnant mother. F0  
369 male chimera mice were mated with F1 Balb/C females to obtain F1 Balb/C DC-SIGN DTR  
370 mice; these mice were then back crossed to C57BL/6 for 12 generations to generate  
371 C57BL/6 DC-SIGN DTR mouse.

372 All mice were bred and maintained in the specific pathogen-free animal facility of the  
373 Nanyang Technological University (Singapore). All studies involving mice in Singapore  
374 were carried out in strict accordance with the recommendations of the National Advisory  
375 Committee for Laboratory Animal Research and all protocols were approved by the  
376 Institutional Animal Care and Use Committee of the Nanyang Technological University. For  
377 animal work performed in New Zealand, experimental protocols were approved by the  
378 Victoria University of Wellington Animal Ethics Committee and performed in accordance  
379 with institutional guidelines.

380

### 381 **Tamoxifen-inducible fate-mapping mouse models**

382 *Kit<sup>MerCreMer/R26</sup>* and DC-SIGN-DTR- *Kit<sup>MerCreMer/R26</sup>* fate-mapping mice were used to monitor  
383 the turnover rates of distinct skin-related DC subpopulation subsets. Each mouse was

384 administered 4 mg tamoxifen (TAM) (Sigma-Aldrich, St. Louis, MO, USA) for five  
385 consecutive days by oral gavage for adult labelling, as previously described (Sheng et al.,  
386 2015). Pregnant mice (E7.5) were injected once with 16 mg TAM for embryo labelling.

387

### 388 **Diphtheria toxin (DT) injection**

389 DC-SIGN-DTR<sup>pos</sup> and DC-SIGN-DTR<sup>neg</sup> mice were injected intraperitoneally (i.p.) with 20  
390 ng/g DT (Sigma-Aldrich) to deplete DC-SIGN-expressing cells. Two different DT injection  
391 protocols were used (Fig. 6A). For the short term depletion protocol, mice were injected i.p.  
392 at day -2 and -1 before collections of tissues. For the long-term protocol, DT was injected  
393 once a week over 5 weeks prior tissue collection.

394

### 395 **Generation of BM chimeras**

396 Chimeric mice were generated by irradiating recipient C57BL/6 or DC-SIGN-DTR mice  
397 (CD45.2<sup>+</sup>) with two doses of 550 Gy, 4 h apart. Then, 10<sup>6</sup> B6.Ly5.1 (CD45.1<sup>+</sup>) BM cells  
398 were injected intravenously (i.v), 24 h after treatment. The mice were allowed to recover  
399 from 1 to 4 months before analysis.

400

### 401 **Isolation of epidermal, dermal and LN cells**

402 Mouse ears were cut and separated into dorsal and ventral halves using fine forceps. Both  
403 the dorsal and ventral halves (with the epidermis side facing upwards) were incubated for 1  
404 h at 37°C in 1 ml IMDM (Thermo-Fisher Scientific, Waltham, MA, USA) medium containing  
405 1U Dispase II (Thermo-Fisher Scientific). The epidermis and dermis were separated using  
406 fine forceps, cut into small pieces and digested for another 1 h at 37°C in 1 mg/ml  
407 Collagenase D (Roche, Basel, Switzerland). To obtain single-cell suspensions, the  
408 digested tissue was passed through a 40 µm cell strainer. To process skin-draining LNs,  
409 the dissected LNs were minced and incubated in 1 mg/ml Collagenase D for 60 min at  
410 37°C.

411



## 412 **Antibodies**

413 The following antibodies were used: anti-mouse CD45 (30-F11), anti-mouse CD11b  
414 (M1/70), anti-mouse F4/80 (BM8), anti-mouse Ly6c (HK1.4), anti-mouse CD11c (N418),  
415 anti-mouse I-A/I-E (M5/114.15.2), anti-mouse CD103 (2E7), anti-mouse CD326 (G8.8),  
416 anti-mouse CD207 (4C7), anti-mouse CD45.1 (A20), anti-mouse CD45.2 (104). They were  
417 purchased all from Biolegend (San Diego, CA, USA). Anti- mouse CD45 microbeads from  
418 Milteny (Bergisch Gladbach, Germany).

419

## 420 **Flow cytometry analysis of skin-related DC subpopulations**

421 Single-cell epidermal, dermal or LN tissue suspensions were pre-incubated with 10 µg/ml  
422 anti-Fc receptor antibody (2.4G2) on ice for 20 min. Then, the suspensions were further  
423 incubated with fluorochrome-labeled antibodies at 4°C for 20 min, before being washed and  
424 re-suspended in PBS/2% FCS for analysis on a five-laser flow cytometer (LSR  
425 Fortessa™; BD Bioscience, San Jose, CA, USA). The data were analysed with FlowJo  
426 software (TreeStar, Ashland, OR, USA) and UMAP analysis was performed using the  
427 FlowJo UMAP plugin.

428

## 429 **Single cell RNAseq analysis**

430 Immune cells were enriched using anti-mouse CD45 microbeads from dermal single cell  
431 suspension. Briefly, enriched CD45<sup>+</sup> dermal cells were loaded into Chromium microfluidic  
432 chips with v3 chemistry and barcoded with a 10× Chromium Controller (10X Genomics,  
433 Pleasanton, CA, USA). RNA from the barcoded cells was subsequently reverse-transcribed  
434 and sequencing libraries constructed with reagents from a Chromium Single Cell v3  
435 reagent kit (10X Genomics) according to the manufacturer's instructions. Library  
436 sequencing was performed at Novogene Co., Ltd (Tianjin Novogen Technology Co., Tianjin,  
437 China) with Illumina HiSeq 2000 according to the manufacturer's instructions (Illumina, San  
438 Diego, USA).

439

## 440 **Single cell data analysis**

441 FastQC was used to perform basic statistics on the quality of the raw reads. Raw reads  
442 were demultiplexed and mapped to the reference genome by 10X Genomics Cell Ranger  
443 pipeline using default parameters. All downstream single-cell analyses were performed  
444 using Cell Ranger and Seurat unless mentioned specifically. In brief, for each gene and  
445 each cell barcode (filtered by Cell Ranger), unique molecule identifiers were counted to  
446 construct digital expression matrices. Secondary filtration for Seurat analysis: a gene with  
447 expression in more than 3 cells was considered as expressed and each cell was required to  
448 have at least 200 expressed genes.

449

## 450 **RNA-sequencing analysis**

451 All mouse RNAs were analyzed using an Agilent Bioanalyser (Agilent, Santa Clara, CA,  
452 USA). The RNA Integrity Number (RIN) ranged from 3.4-9.3, with a median of 8.2. cDNA  
453 libraries were prepared from a range of 18, 24.2, 68 and 100 ng total RNA starting material  
454 using the Ovation Universal RNA-seq system. The length distribution of the cDNA libraries  
455 was monitored using a DNA High Sensitivity Reagent Kit on an Agilent Bioanalyser. All 11  
456 samples were subjected to an indexed paired-end sequencing run of 2x100bp on an  
457 Illumina Novaseq 6000 system (Illumina, San Diego, CA, USA).

458 The paired-end reads were trimmed with trim\_galore1 (option: -q 20 -stringency 5 -paired).  
459 The trimmed paired-end reads were mapped to the Mouse GRCm38/mm10 reference  
460 genome using the STAR2 (version 2.6.0a) alignment tool with multi-sample 2-pass  
461 mapping. Mapped reads were summarized to the gene level using featureCounts3 in the  
462 subread4 software package (version 1.4.6-p5) and with gene annotation from GENCODE  
463 release M19. DESeq25 was used to analyze differentially expressed genes (DEGs), and  
464 significant genes were identified with Benjamini-Hochberg adjusted P-values <0.05.  
465 DESeq2 analysis was carried out in R version 3.5.2.

466 For functional analysis, hierarchical clustering based on Euclidean distance and complete  
467 linkage, was performed using the R “pheatmap” package. Principal Components Analysis

468 (PCA) was performed using the R “prcomp” package. The first two Principal Components  
469 (PC) were analysed on a multi-dimensional scatterplot that was created using the R  
470 “scatterplot 3D” function.

471

#### 472 **Preparation and staining of epidermal sheets**

473 DC-SIGN-DTR<sup>neg</sup> and DC-SIGN-DTR<sup>+</sup> mice were treated for 2 days with DT. Ears were  
474 collected and split into dorsal and ventral halves and subsequently incubated with 3.8%  
475 ammonium thiocyanate (Sigma-Aldrich) in PBS for 20 min at 37°C. Epidermal and dermal  
476 sheets were separated and fixed in ice-cold acetone for 15 min. Then, the epidermal sheets  
477 were pre-incubated with 10 µg/ml anti-Fc receptor antibody (2.4G2) on ice for 20 min and  
478 subsequently stained with FITC-labelled anti MHC class II antibody for a further 30 min on  
479 ice for LC visualization.

#### 480 **Statistics**

481 The data represent the means ± SEM or SD, as indicated in the Figure Legends. GraphPad  
482 Prism software was used to display the data and for statistical analysis. Statistical tests  
483 were selected based on the appropriate assumptions with respect to data distribution and  
484 variance characteristics. All statistical tests are fully described in detail in the Figure  
485 Legends. Samples were analyzed by two-tailed Student's *t*-test to determine statistical  
486 differences between two groups. A two-way ANOVA with Bonferroni-post-test was used to  
487 determine the differences between more than two groups. A P value <0.05 was considered  
488 to be statistically significant. The number of animals used per group is indicated in the  
489 Figure Legends as “n.”

490

491

492 **Data and Code Availability**

493 All RNA-sequencing data have been deposited in the Gene Expression Omnibus public  
494 database under accession number GSE139877. Single cell RNAseq have been deposited  
495 into NCBI SRA database with BioProject ID: PRJNA625270.

496 Original flow cytometry data are deposited in the NTU Open Access Data Repository  
497 DR-NTU. All other data are available from the authors upon reasonable request.

498

499 **Author Contributions**

500 Conceptualization: J.S and C.R.; Methodology: J.S., Q.C., D.Y., W.X., J.M., F.R; Formal  
501 Analysis: J.S and C.R.; Bioinformatic analysis: Y.H.S. and W.B.W.G.; scRNAseq analysis:  
502 W.L., B.X. and L.T. Writing: J.S. and C.R. Visualization: C.R. Supervision: C.R. Funding  
503 Acquisition: J.S. and C.R.

504

505 **Declaration of Interests**

506 The authors declare no competing interests.

507

508 **Acknowledgements**

509 The authors would like to thank Monika Tetlak for mouse management, Su I-hsin and Lim  
510 Jun Feng Thomas for technical advice and Insight Editing London for proofreading the  
511 manuscript prior to submission. This work was supported by Ministry of Education Tier1  
512 grant awarded to C.R. and by the National Key R&D Program of China (Grant  
513 2019YFA0803000) assigned to J.S.. Work at the MIMR was supported by an Independent  
514 Research Organisation grant awarded to the Malaghan Institute of Medical Research from  
515 the Health Research Council of New Zealand

516

517

518

519

## 520 Legends

521

### 522 Fig. 1: Characterization of cutaneous LC and DC subpopulations

523 **A**, Representative flow cytometry dot plots for LC characterization in the epidermis. Cells  
524 from epidermis were first gated for FSC, SSC and CD45 (not shown). Then, CD45<sup>+</sup> cells  
525 were analyzed for CD11b and F4/80 expression. The CD11b<sup>hi</sup>F4/80<sup>hi</sup> cell fraction was  
526 further analysed for CD207 and CD326 expression to identify classical *bona fide* LCs. **B**,  
527 Representative flow cytometry dot plots for dermal LC and DC subpopulations. Isolated  
528 dermis cells were first gated for FSC, SSC and CD45 (not shown). CD45<sup>+</sup> cells were then  
529 analyzed for CD11b and F4/80 expression. The CD11b<sup>hi</sup> F4/80<sup>hi</sup> fraction contained  
530 classical CD207<sup>+</sup>CD326<sup>+</sup> LCs. The remaining cells were gated for CD11c<sup>+</sup>MHC II<sup>+</sup> DCs and  
531 separated into three subsets based on CD103 and CD11b expression: CD103<sup>+</sup>CD11b<sup>-</sup> cells  
532 (labelled cDC1), CD103<sup>-</sup>CD11b<sup>hi</sup> DCs (labelled CD11b<sup>hi</sup>), and CD11b<sup>low/neg</sup>. CD207 and  
533 CD326 expression was detectable on cDC1 but not CD11b<sup>hi</sup> DCs, whereas CD11b<sup>low</sup> cells  
534 were further separated into CD207<sup>-</sup>CD326<sup>-</sup> (labelled TN) and CD207<sup>+</sup>CD326<sup>+</sup> (labelled  
535 LC<sup>like</sup>). **C**, Representative flow cytometry dot plots for cutaneous DC subpopulations in  
536 skin-draining LNs. LN cells were first gated for FSC and SSC before F4/80 and CD11b  
537 staining. The cell fraction excluding F4/80<sup>hi</sup>/CD11b<sup>hi</sup> cells was separated by CD11c and  
538 MHCII. CD11c<sup>hi</sup>MHCII<sup>hi</sup> migratory DCs were gated and analysed for CD103, CD11b,  
539 CD207 and CD326 expression. Four subsets were detected:  
540 CD103<sup>+</sup>CD11b<sup>-</sup>CD207<sup>+</sup>CD326<sup>+</sup> (cDC1), CD103<sup>-</sup>CD11b<sup>low</sup>CD207<sup>-</sup>CD326<sup>-</sup> (TN),  
541 CD103<sup>-</sup>CD11b<sup>low</sup>CD207<sup>+</sup>CD326<sup>+</sup> (LC<sup>like</sup>) and CD103<sup>-</sup>CD11b<sup>hi</sup>CD207<sup>-</sup>CD326<sup>-/+</sup>(CD11b<sup>hi</sup>). **D**,  
542 Frequency of each DC subpopulation (LC, cDC1, LC<sup>like</sup>, TN and CD11b<sup>hi</sup>) present in  
543 epidermis, dermis and cutaneous LN, respectively.

544

545 **Fig. 2: Single cell RNAseq analysis reveals LC and LC<sup>like</sup> cells as two distinct cell**  
546 **populations in the dermis.** 9605 cells pooled from the dermis collected from 6 mice which  
547 passed QC were imported for Seurat analysis. **A**, UMAP plot is revealing the existence of 9

548 distinct cell clusters (1) LC [blue], (2) LC<sup>like</sup> [orange], (3) Mast cells/neutrophils [green], (4)  
549 DC/monocytes [red], (5) macrophages [purple], (6) lymphocytes 1 [brown], (7) lymphocytes  
550 2 [pink], (8) mesenchymal cells [light green] and (9) epithelial cells [light blue]. **B, C**, UMAP  
551 maps showing the expression of various LC signature genes in DC/mono (**B**) and LC/LC<sup>like</sup>  
552 clusters (**C**). **D**, heat-map of single-cell gene expression data based on the top differential  
553 expressed genes discriminating LC/LC<sup>like</sup> clusters. Cells (LC in green; LC<sup>like</sup> in purple) are  
554 shown in rows and genes in columns.

555

556 **Fig. 3: Distinct embryonic origin between LC and LC<sup>like</sup> cells.** **A**, Single pulse of TAM at  
557 E7.5 was given to label Kit<sup>MerCreMerR26</sup> embryos and the percentages of labeled brain  
558 microglia (positive control), epidermal LCs and dermal LC/DC subpopulations were  
559 measured at 3 months of age. **B-D**, Flow cytometry analysis of YFP labelling of microglia  
560 (**B**), and each LC and DC subpopulation in the epidermis (**C**) and dermis (**D**) in  
561 Kit<sup>MerCreMer/R26</sup> fate mapping mice. Representative contour plots are shown. **E**, The mean  
562 percentage of YFP<sup>+</sup> cells of brain microglia, epidermal LC and dermal DC subpopulations  
563 (LC, cDC1, LC<sup>like</sup>, CD11b<sup>hi</sup> and TN cells). The error bars represent the SEM (n= 4 samples  
564 of 2-3 pooled mice). Data from two independent experiments. \* P <0.05; two-way ANOVA  
565 followed by Bonferroni test. For clarity non-significant values are not shown.

566

567

568 **Fig. 4: LC<sup>like</sup> cells display a dual origin with a similar transcriptomic signature.**

569 **A**, Generation of BM chimeras: CD45.1<sup>+</sup> WT BM cells (10<sup>6</sup>) were transferred into lethally  
570 irradiated CD45.2<sup>+</sup> recipient mice. The epidermis, dermis and draining LNs obtained from  
571 the reconstituted chimeras were analysed 1 and 4 months later by flow cytometry. **B**, Flow  
572 cytometry analysis of donor (CD45.1<sup>+</sup>) and host (CD45.2<sup>+</sup>) chimerism in different epidermal,  
573 dermal and skin-draining LN LC and DC subpopulations, 1 and 4 months after  
574 reconstitution. LC, cDC1, TN, LC<sup>like</sup> and CD11b<sup>hi</sup> subsets were gated and analysed for  
575 CD45.1 (x-axis) and CD45.2 (y-axis) expression. **C**, The percentage of CD45.1 donor cells

576 detected in the epidermis, dermis and skin-draining LNs of chimeras, 1 or 4 months after  
577 reconstitution. Data are represented as mean  $\pm$  SEM;  $n = 6$  single mice; \*\*\*  $P < 0.001$ ; \*\*\*\*  
578  $P < 0.0001$ ; ns, non-significant; unpaired Student's t-test. **D**, UMAP analysis of distinct LN  
579 DC subpopulations obtained from chimeras 4 months after reconstitution, based on the  
580 expression of different markers (CD11c, MHCII, CD103, CD11b, EPCAM, CD207, CD45.1,  
581 CD45.2). **E**, Transcriptome analysis of LN CD45.1<sup>+</sup> LC<sup>like</sup> cells ( $n=3$ ) and LN CD45.2<sup>+</sup> LC<sup>like</sup>  
582 ( $n=3$ ) cells collected from 10 mice. The Venn diagram shows the percentage of overlapping  
583 genes expressed by CD45.1<sup>+</sup> and CD45.2<sup>+</sup> LC<sup>like</sup> cells.

584

585 **Fig. 5: Slow turnover kinetics for dermal and LN LC<sup>like</sup> cells.** **A**, *Kit*<sup>MerCreMer/R26</sup> mice  
586 aged 6-weeks old mice were injected with tamoxifen five times and groups of six animals  
587 were sacrificed 1, 4 and 8 months later for fate mapping analysis. **B**, Flow cytometry  
588 analysis of YFP labelling of each LC and DC subpopulation in the epidermis (upper left),  
589 dermis (lower left) and skin-draining LNs (lower right) in *Kit*<sup>MerCreMer/R26</sup> fate mapping mice.  
590 Representative histograms are shown. **C**, The mean percentage of YFP<sup>+</sup> cells after  
591 normalization to cDC1. Epidermis (left), dermis (middle) and skin-draining LNs (right) were  
592 analysed. Data are represented as mean  $\pm$  SEM;  $n = 6-9$  single mice. \*\*\*\*  $P < 0.0001$ ;  
593 two-way ANOVA followed by Bonferroni test.

594

595 **Fig. 6: Classical LC, but not LC<sup>like</sup> cells are ablated in vivo in DC-SIGN DTR mice**

596 **A**, The short-term and long-term depletion protocol in DC-SIGN-DTR mice. **B**,  
597 Representative flow cytometry dot plots of single-cell suspensions from the epidermis (left),  
598 dermis (middle) and skin-draining LNs (right) obtained from DT-injected WT and  
599 DC-SIGN-DTR mice. All mice were injected (i.p.) with 10 ng/g DT on days -2 and -1 and  
600 analysed on day 0. The gating strategy shown in Figure 1 was followed. Epidermal sheets  
601 obtained from WT and DC-SIGN mice were stained for MHC class II (green fluorescence)  
602 and analysed by immunofluorescence microscopy (lower left panel). **C**, The absolute  
603 numbers of each gated myeloid cell subset (LC, cDC1, TN, LC<sup>like</sup> and CD11b<sup>hi</sup> cells)

604 obtained from the epidermis, dermis and skin-draining LNs of DT-injected WT and  
605 DC-SIGN DTR mice. Data are represented as mean  $\pm$  SEM;  $n = 8$  single mice. \*\*\*\*  $P$   
606  $<0.0001$ ; \*\*\*  $P <0.001$ ; \*  $P <0.05$ ; ns, non-significant; one-way ANOVA followed by  
607 Bonferroni test.

608

609

610 **Fig. 7: Fate mapping analysis in DC-SIGN DTR-Kit<sup>MerCreMer/R26</sup> mice.** **A**, Mice aged  
611 6-weeks old were orally gavaged with TAM. After 4 months, DT was injected i.p. weekly for  
612 5 weeks to ensure long-term LC depletion. **B**, Representative contour plots showing the  
613 YFP labelling of distinct LN DC subpopulations in DT-treated Kit<sup>MerCreMer/R26</sup> and DC-SIGN  
614 DTR-Kit<sup>MerCreMer/R26</sup> mice. **C**, The percentage of normalized YFP labelling detected in DC  
615 subpopulations (LC, cDC1, TN, LC<sup>like</sup> and CD11b<sup>hi</sup> cells) of the skin-draining LNs.  
616 Normalization was performed as described in Fig. 5; Data are represented as  
617 mean  $\pm$  SEM;  $n = 12$  single mice.

618

619

620

621



622

623

## 624 **References**

- 625 Bennett, C.L., E. van Rijn, S. Jung, K. Inaba, R.M. Steinman, M.L. Kapsenberg, and B.E. Clausen. 2005. Inducible ablation  
626 of mouse Langerhans cells diminishes but fails to abrogate contact hypersensitivity. *J Cell Biol* 169:569-576.
- 627 Bobr, A., I. Olvera-Gomez, B.Z. Igyarto, K.M. Haley, K.A. Hogquist, and D.H. Kaplan. 2010. Acute ablation of Langerhans  
628 cells enhances skin immune responses. *J Immunol* 185:4724-4728.
- 629 Bogunovic, M., F. Ginhoux, A. Wagers, M. Loubreau, L.M. Isola, L. Lubrano, V. Najfeld, R.G. Phelps, C. Grosskreutz, E.  
630 Scigliano, P.S. Frenette, and M. Merad. 2006. Identification of a radio-resistant and cycling dermal dendritic  
631 cell population in mice and men. *J Exp Med* 203:2627-2638.
- 632 Bursch, L.S., L. Wang, B. Igyarto, A. Kissenpfennig, B. Malissen, D.H. Kaplan, and K.A. Hogquist. 2007. Identification of a  
633 novel population of Langerin+ dendritic cells. *J Exp Med* 204:3147-3156.
- 634 Clausen, B.E., and P. Stoitzner. 2015. Functional Specialization of Skin Dendritic Cell Subsets in Regulating T Cell  
635 Responses. *Front Immunol* 6:534.
- 636 Doebel, T., B. Voisin, and K. Nagao. 2017. Langerhans Cells - The Macrophage in Dendritic Cell Clothing. *Trends*  
637 *Immunol* 38:817-828.
- 638 Douillard, P., P. Stoitzner, C.H. Tripp, V. Clair-Moninot, S. Ait-Yahia, A.D. McLellan, A. Eggert, N. Romani, and S. Saeland.  
639 2005. Mouse lymphoid tissue contains distinct subsets of langerin/CD207 dendritic cells, only one of which  
640 represents epidermal-derived Langerhans cells. *J Invest Dermatol* 125:983-994.
- 641 Gautier, E.L., T. Shay, J. Miller, M. Greter, C. Jakubzick, S. Ivanov, J. Helft, A. Chow, K.G. Elpek, S. Gordonov, A.R.  
642 Mazloom, A. Ma'ayan, W.J. Chua, T.H. Hansen, S.J. Turley, M. Merad, G.J. Randolph, and C. Immunological  
643 Genome. 2012. Gene-expression profiles and transcriptional regulatory pathways that underlie the identity  
644 and diversity of mouse tissue macrophages. *Nat Immunol* 13:1118-1128.
- 645 Ghigo, C., I. Mondor, A. Jorquera, J. Nowak, S. Wienert, S.P. Zahner, B.E. Clausen, H. Luche, B. Malissen, F. Klauschen,  
646 and M. Bajenoff. 2013. Multicolor fate mapping of Langerhans cell homeostasis. *J Exp Med* 210:1657-1664.
- 647 Ginhoux, F., M.P. Collin, M. Bogunovic, M. Abel, M. Leboeuf, J. Helft, J. Ochando, A. Kissenpfennig, B. Malissen, M.  
648 Grisotto, H. Snoeck, G. Randolph, and M. Merad. 2007. Blood-derived dermal langerin+ dendritic cells survey  
649 the skin in the steady state. *J Exp Med* 204:3133-3146.
- 650 Henri, S., L.F. Poulin, S. Tamoutounour, L. Ardouin, M. Guilliams, B. de Bovis, E. Devilard, C. Viret, H. Azukizawa, A.  
651 Kissenpfennig, and B. Malissen. 2010. CD207+ CD103+ dermal dendritic cells cross-present  
652 keratinocyte-derived antigens irrespective of the presence of Langerhans cells. *J Exp Med* 207:189-206.
- 653 Henri, S., D. Vremec, A. Kamath, J. Waithman, S. Williams, C. Benoist, K. Burnham, S. Saeland, E. Handman, and K.  
654 Shortman. 2001. The dendritic cell populations of mouse lymph nodes. *J Immunol* 167:741-748.
- 655 Hoeffel, G., Y. Wang, M. Greter, P. See, P. Teo, B. Malleret, M. Leboeuf, D. Low, G. Oller, F. Almeida, S.H. Choy, M.  
656 Grisotto, L. Renia, S.J. Conway, E.R. Stanley, J.K. Chan, L.G. Ng, I.M. Samokhvalov, M. Merad, and F. Ginhoux.  
657 2012. Adult Langerhans cells derive predominantly from embryonic fetal liver monocytes with a minor  
658 contribution of yolk sac-derived macrophages. *J Exp Med* 209:1167-1181.
- 659 Kaplan, D.H., M.C. Jenison, S. Saeland, W.D. Shlomchik, and M.J. Shlomchik. 2005. Epidermal langerhans cell-deficient  
660 mice develop enhanced contact hypersensitivity. *Immunity* 23:611-620.
- 661 Kissenpfennig, A., S. Henri, B. Dubois, C. Laplace-Builhe, P. Perrin, N. Romani, C.H. Tripp, P. Douillard, L. Leserman, D.  
662 Kaiserlian, S. Saeland, J. Davoust, and B. Malissen. 2005. Dynamics and function of Langerhans cells in vivo:

- 663 dermal dendritic cells colonize lymph node areas distinct from slower migrating Langerhans cells. *Immunity*  
664 22:643-654.
- 665 Langerhans, P. 1868. Über Die Nerven Der Menschlichen Haut. *Archiv für Pathologische Anatomie und Physiologie und*  
666 *für Klinische Medizin* 44:325-337.
- 667 Merad, M., M.G. Manz, H. Karsunky, A. Wagers, W. Peters, I. Charo, I.L. Weissman, J.G. Cyster, and E.G. Engleman.  
668 2002. Langerhans cells renew in the skin throughout life under steady-state conditions. *Nat Immunol*  
669 3:1135-1141.
- 670 Molawi, K., Y. Wolf, P.K. Kandalla, J. Favret, N. Hagemeyer, K. Frenzel, A.R. Pinto, K. Klapproth, S. Henri, B. Malissen,  
671 H.R. Rodewald, N.A. Rosenthal, M. Bajenoff, M. Prinz, S. Jung, and M.H. Sieweke. 2014. Progressive  
672 replacement of embryo-derived cardiac macrophages with age. *J Exp Med* 211:2151-2158.
- 673 Nagao, K., F. Ginhoux, W.W. Leitner, S. Motegi, C.L. Bennett, B.E. Clausen, M. Merad, and M.C. Udey. 2009. Murine  
674 epidermal Langerhans cells and langerin-expressing dermal dendritic cells are unrelated and exhibit distinct  
675 functions. *Proc Natl Acad Sci U S A* 106:3312-3317.
- 676 Noordegraaf, M., V. Flacher, P. Stoitzner, and B.E. Clausen. 2010. Functional redundancy of Langerhans cells and  
677 Langerin+ dermal dendritic cells in contact hypersensitivity. *J Invest Dermatol* 130:2752-2759.
- 678 Piva, L., P. Tetlak, C. Claser, K. Karjalainen, L. Renia, and C. Ruedl. 2012. Cutting edge: Clec9A+ dendritic cells mediate  
679 the development of experimental cerebral malaria. *J Immunol* 189:1128-1132.
- 680 Poulin, L.F., S. Henri, B. de Bovis, E. Devilard, A. Kissenpfennig, and B. Malissen. 2007. The dermis contains langerin+  
681 dendritic cells that develop and function independently of epidermal Langerhans cells. *J Exp Med*  
682 204:3119-3131.
- 683 Romani, N., B.E. Clausen, and P. Stoitzner. 2010. Langerhans cells and more: langerin-expressing dendritic cell subsets  
684 in the skin. *Immunol Rev* 234:120-141.
- 685 Romani, N., S. Holzmann, C.H. Tripp, F. Koch, and P. Stoitzner. 2003. Langerhans cells - dendritic cells of the epidermis.  
686 *APMIS* 111:725-740.
- 687 Romani, N., G. Ratzinger, K. Pfaller, W. Salvenmoser, H. Stossel, F. Koch, and P. Stoitzner. 2001. Migration of dendritic  
688 cells into lymphatics-the Langerhans cell example: routes, regulation, and relevance. *Int Rev Cytol*  
689 207:237-270.
- 690 Romani, N., and G. Schuler. 1989. Structural and functional relationships between epidermal Langerhans cells and  
691 dendritic cells. *Res Immunol* 140:895-898; discussion 918-826.
- 692 Ruedl, C., P. Koebel, M. Bachmann, M. Hess, and K. Karjalainen. 2000. Anatomical origin of dendritic cells determines  
693 their life span in peripheral lymph nodes. *J Immunol* 165:4910-4916.
- 694 Schuler, G., and R.M. Steinman. 1985. Murine epidermal Langerhans cells mature into potent immunostimulatory  
695 dendritic cells in vitro. *J Exp Med* 161:526-546.
- 696 Sheng, J., Q. Chen, I. Soncin, S.L. Ng, K. Karjalainen, and C. Ruedl. 2017. A Discrete Subset of Monocyte-Derived Cells  
697 among Typical Conventional Type 2 Dendritic Cells Can Efficiently Cross-Present. *Cell Rep* 21:1203-1214.
- 698 Sheng, J., C. Ruedl, and K. Karjalainen. 2015. Most Tissue-Resident Macrophages Except Microglia Are Derived from  
699 Fetal Hematopoietic Stem Cells. *Immunity* 43:382-393.
- 700 Soncin, I., J. Sheng, Q. Chen, S. Foo, K. Duan, J. Lum, M. Poidinger, F. Zolezzi, K. Karjalainen, and C. Ruedl. 2018. The  
701 tumour microenvironment creates a niche for the self-renewal of tumour-promoting macrophages in colon  
702 adenoma. *Nat Commun* 9:582.

703 Tamoutounour, S., M. Guilliams, F. Montanana Sanchis, H. Liu, D. Terhorst, C. Malosse, E. Pollet, L. Ardouin, H. Luche,  
704 C. Sanchez, M. Dalod, B. Malissen, and S. Henri. 2013. Origins and functional specialization of macrophages  
705 and of conventional and monocyte-derived dendritic cells in mouse skin. *Immunity* 39:925-938.

706 Valladeau, J., O. Ravel, C. Dezutter-Dambuyant, K. Moore, M. Kleijmeer, Y. Liu, V. Duvert-Frances, C. Vincent, D.  
707 Schmitt, J. Davoust, C. Caux, S. Lebecque, and S. Saeland. 2000. Langerin, a novel C-type lectin specific to  
708 Langerhans cells, is an endocytic receptor that induces the formation of Birbeck granules. *Immunity* 12:71-81.

709 West, H.C., and C.L. Bennett. 2017. Redefining the Role of Langerhans Cells As Immune Regulators within the Skin.  
710 *Front Immunol* 8:1941.

711 Wilson, N.S., and J.A. Villadangos. 2004. Lymphoid organ dendritic cells: beyond the Langerhans cells paradigm.  
712 *Immunol Cell Biol* 82:91-98.

713 Wynn, T.A., A. Chawla, and J.W. Pollard. 2013. Macrophage biology in development, homeostasis and disease. *Nature*  
714 496:445-455.

715

716

717

718

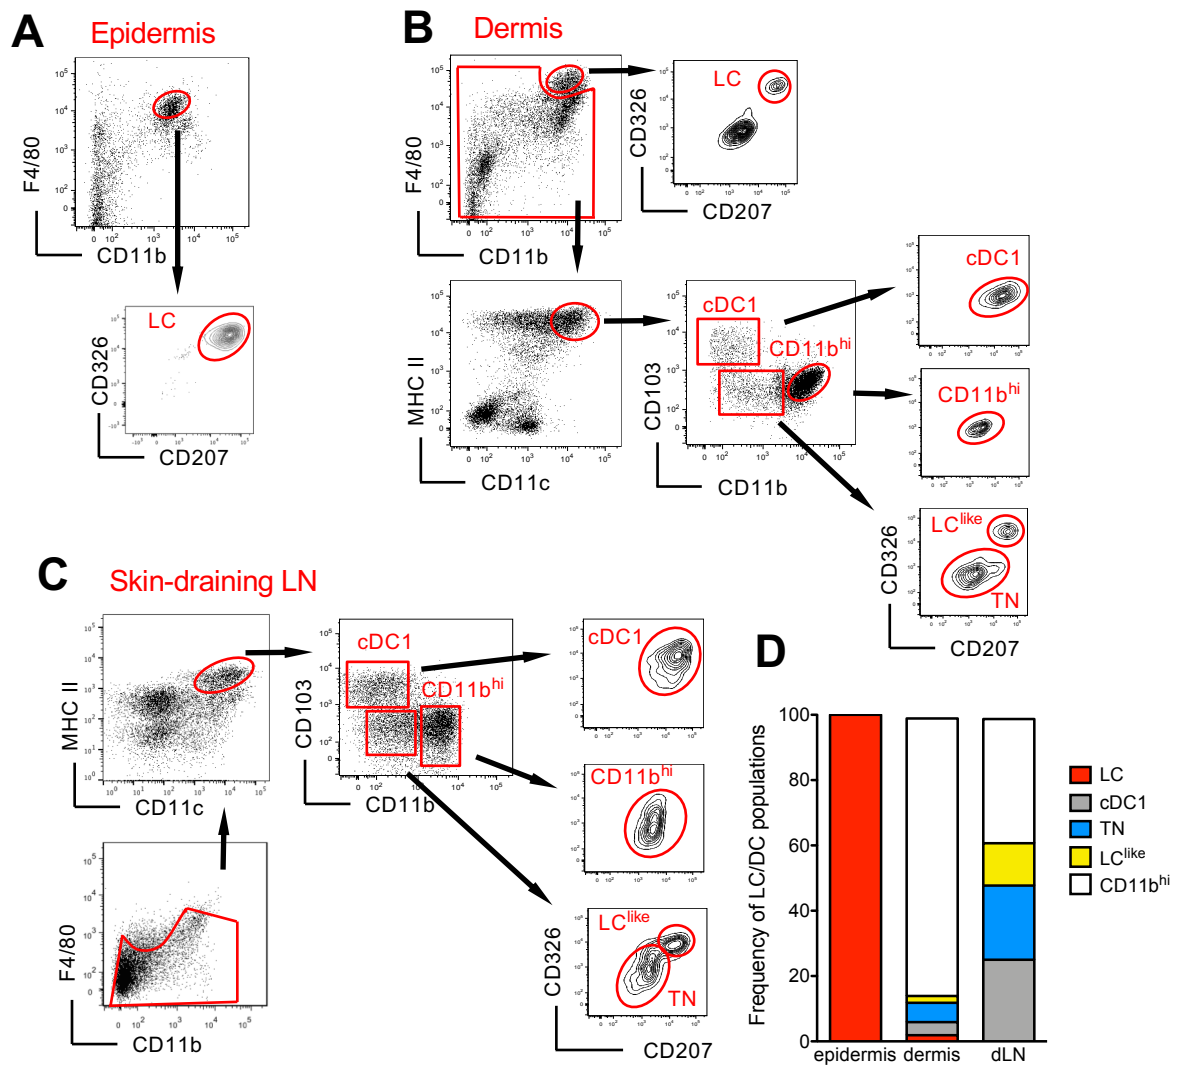

**Fig. 1: Characterization of cutaneous LC and DC subpopulations (Sheng et al 2020)**

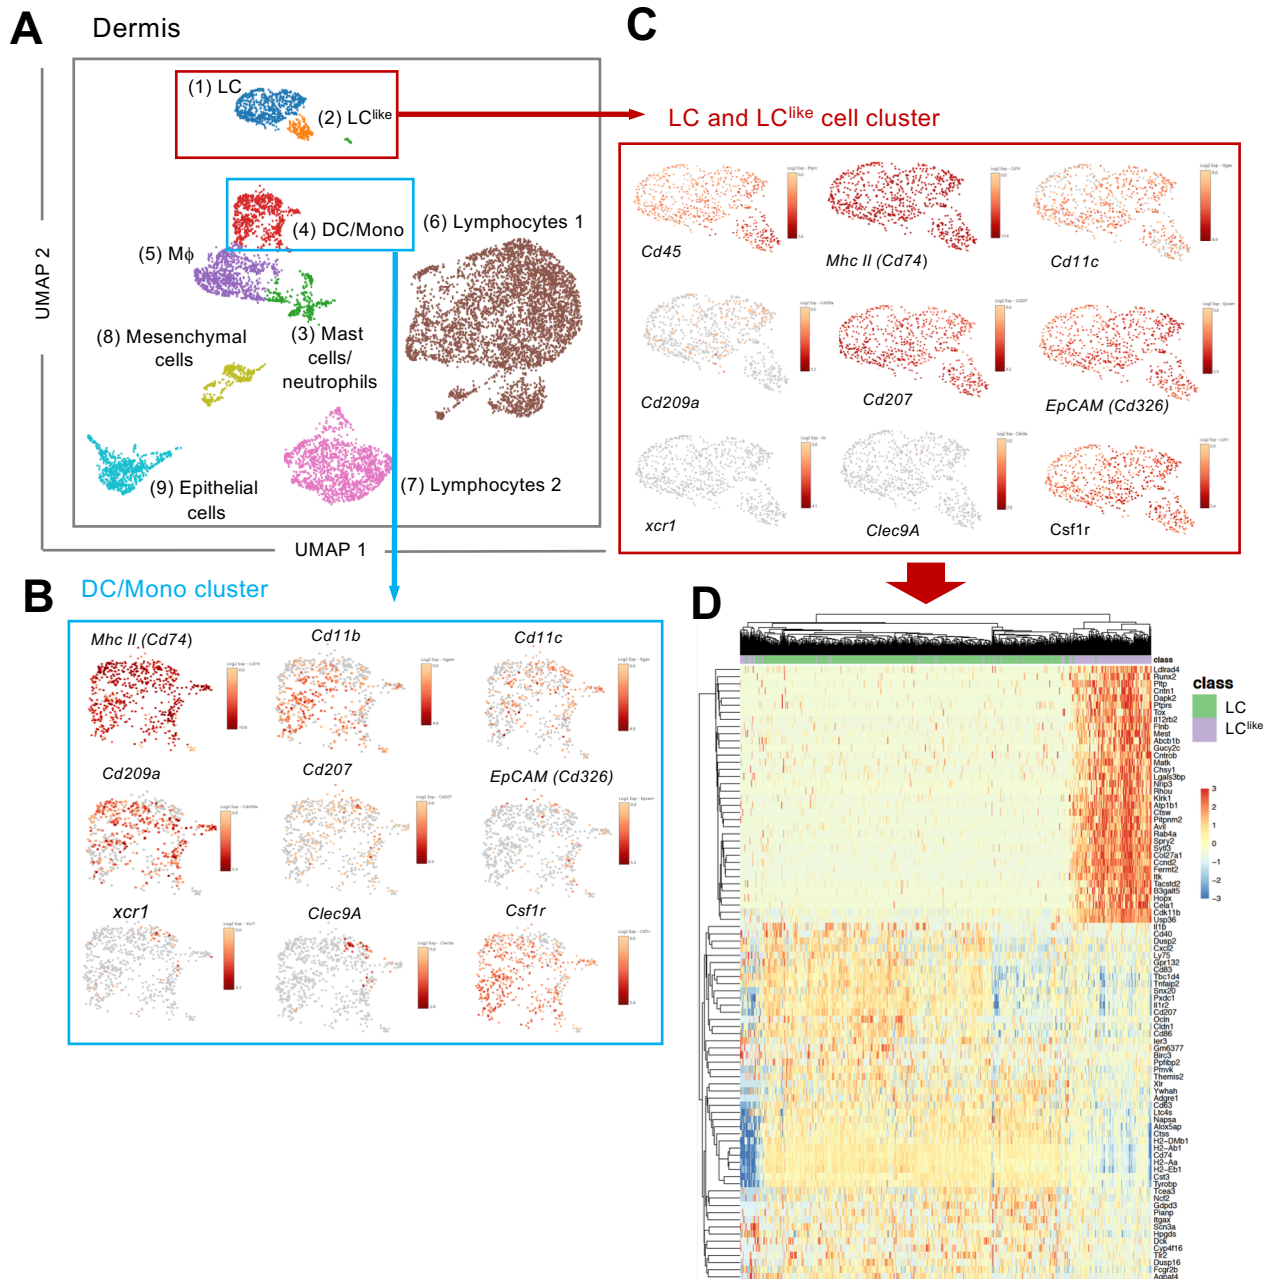

**Fig. 2: Single cell RNAseq analysis reveals LC and LC<sup>like</sup> cells as two distinct cell populations in the dermis (Sheng et al 2020)**

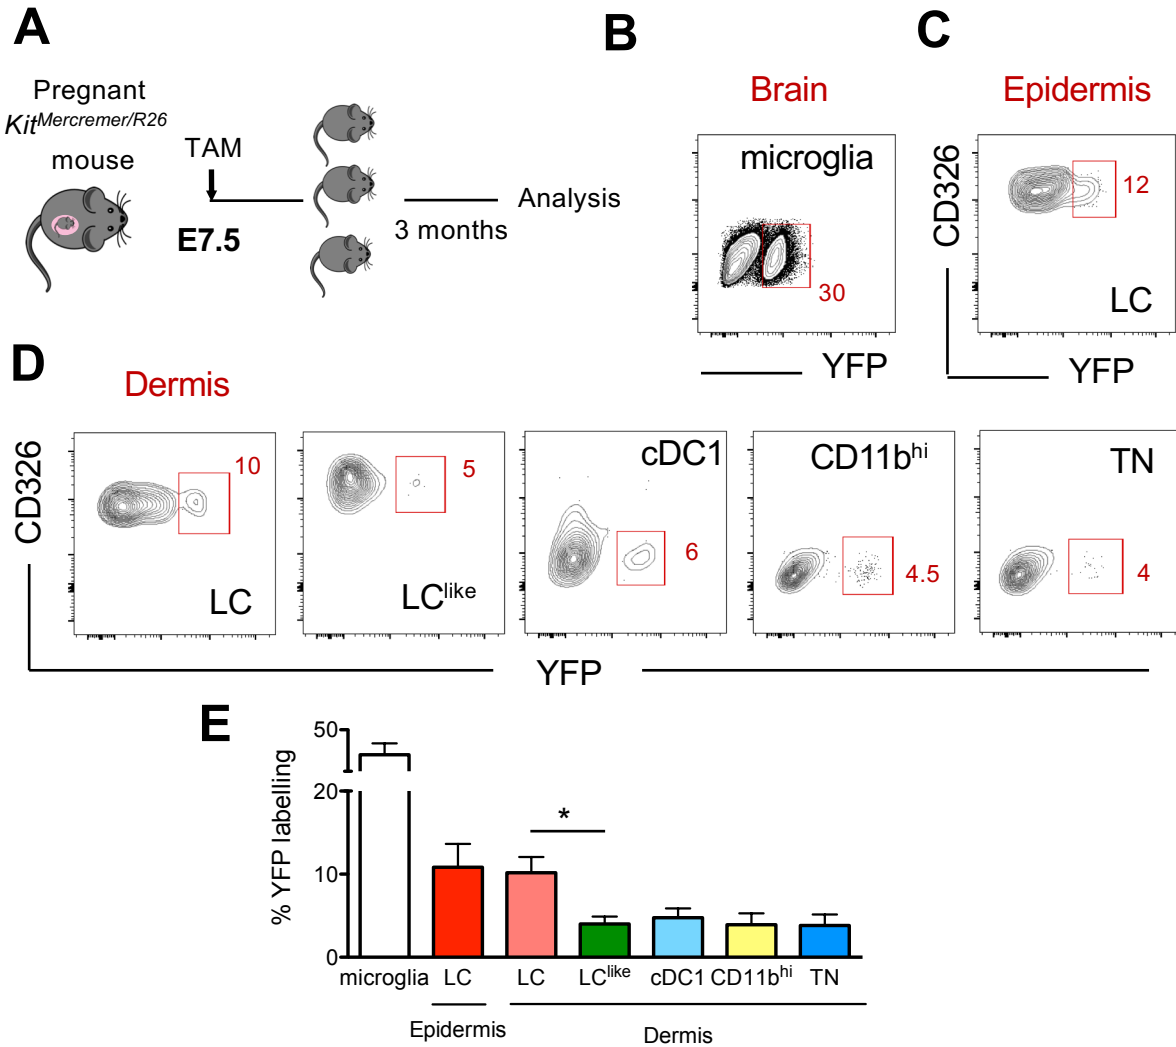

**Fig. 3: Distinct embryonic origin between LC and LC<sup>like</sup> cells. (Sheng et al 2020)**

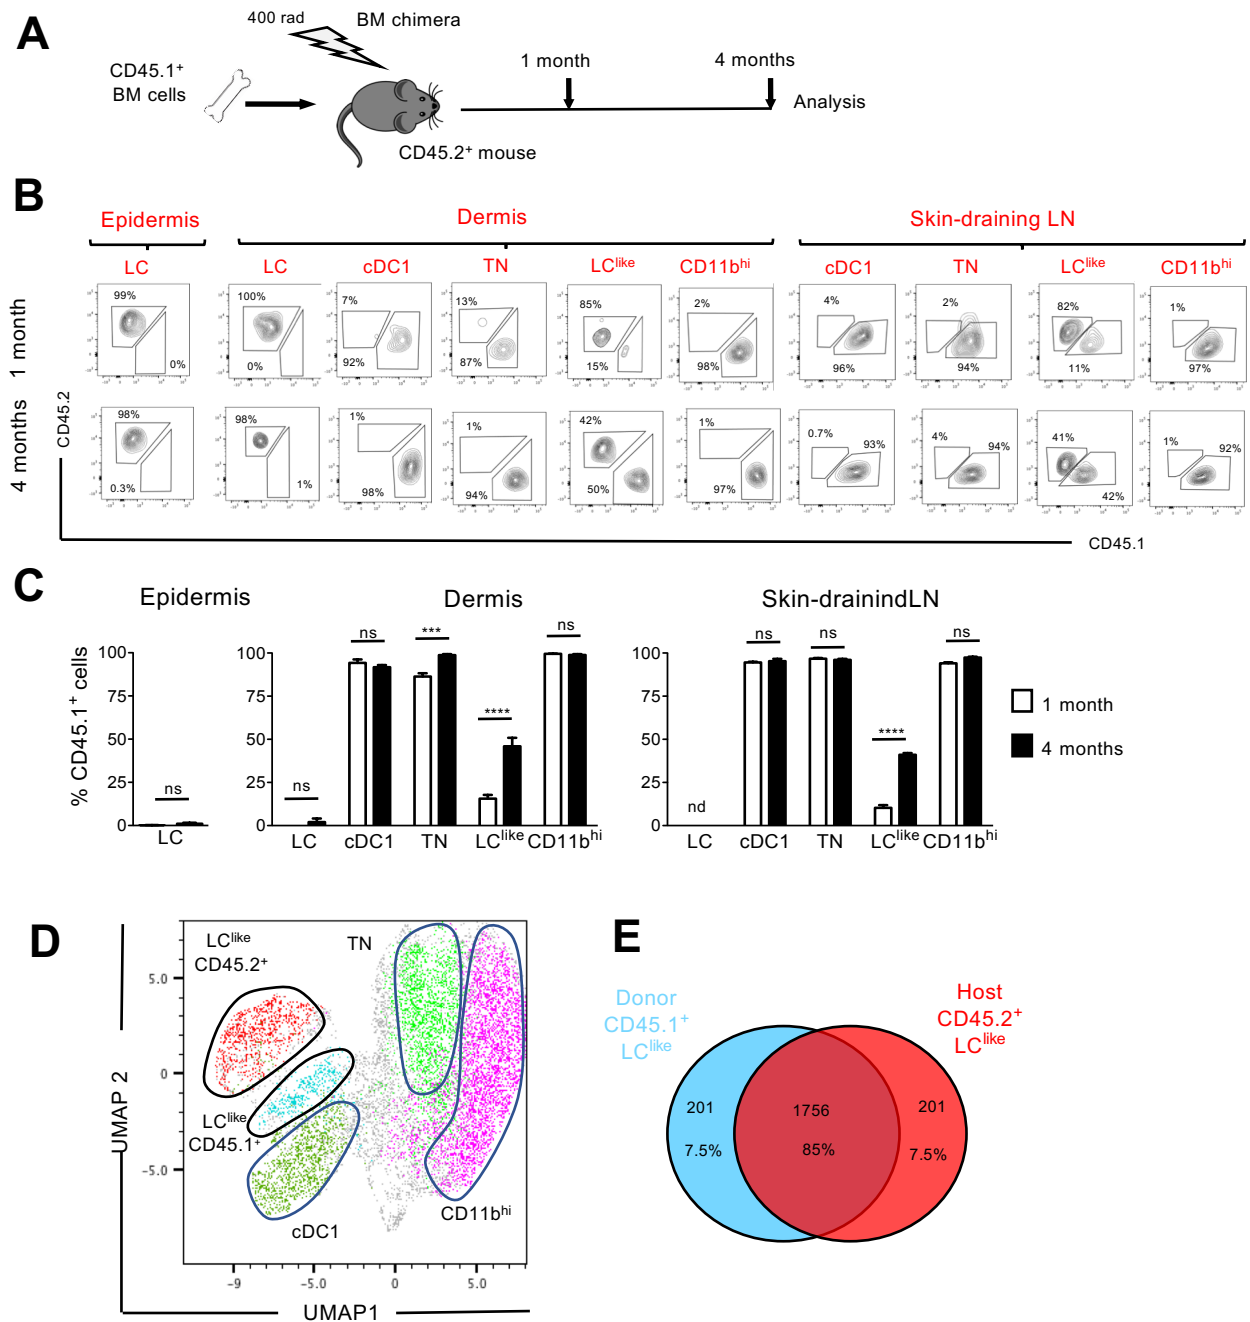

**Fig. 4: LC<sup>like</sup> cells display a dual origin with a similar transcriptomic signature. (Sheng et al 2020)**

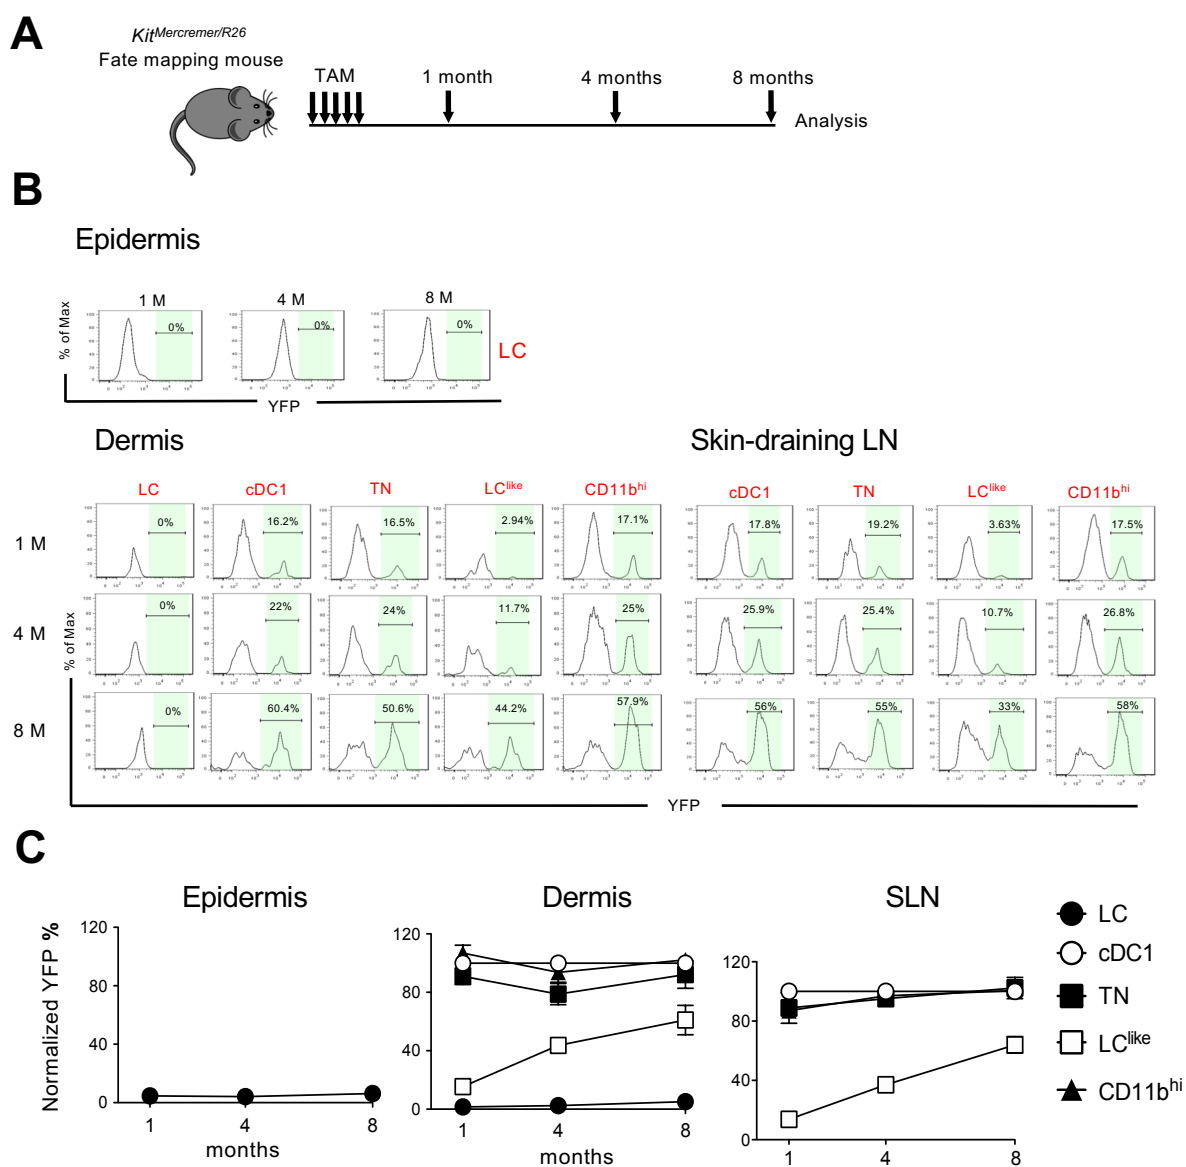

**Fig. 5: Slow turnover kinetics for dermal and LN LC<sup>like</sup> cells.**  
(Sheng et al 2020)



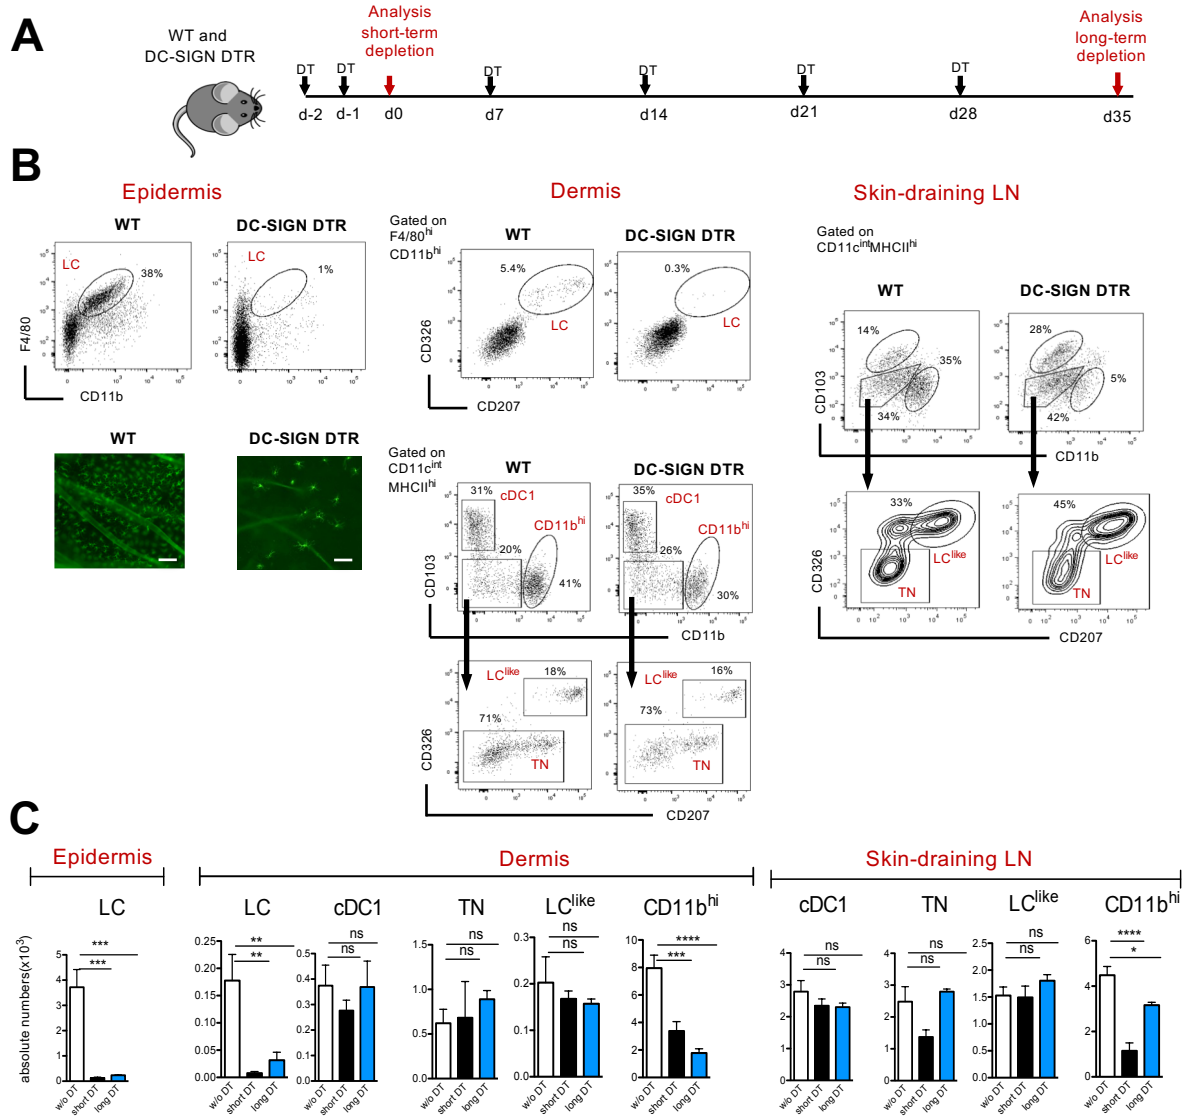

**Fig. 6: Classical LC, but not LC<sup>like</sup> cells are ablated in vivo in DC-SIGN DTR mice (Sheng et al 2020)**

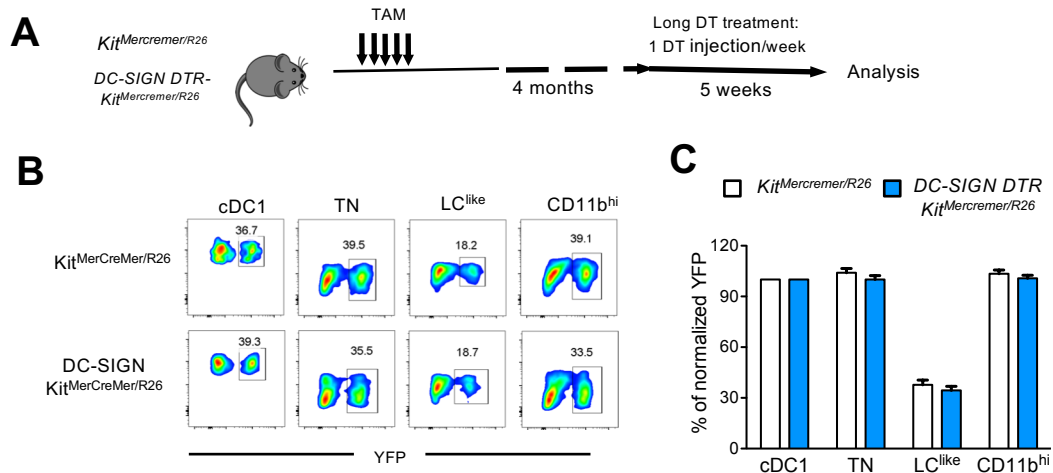

**Fig. 7: Fate mapping analysis in DC-SIGN DTR-Kit<sup>MerCreMer/R26</sup> mice (Sheng et al 2020)**

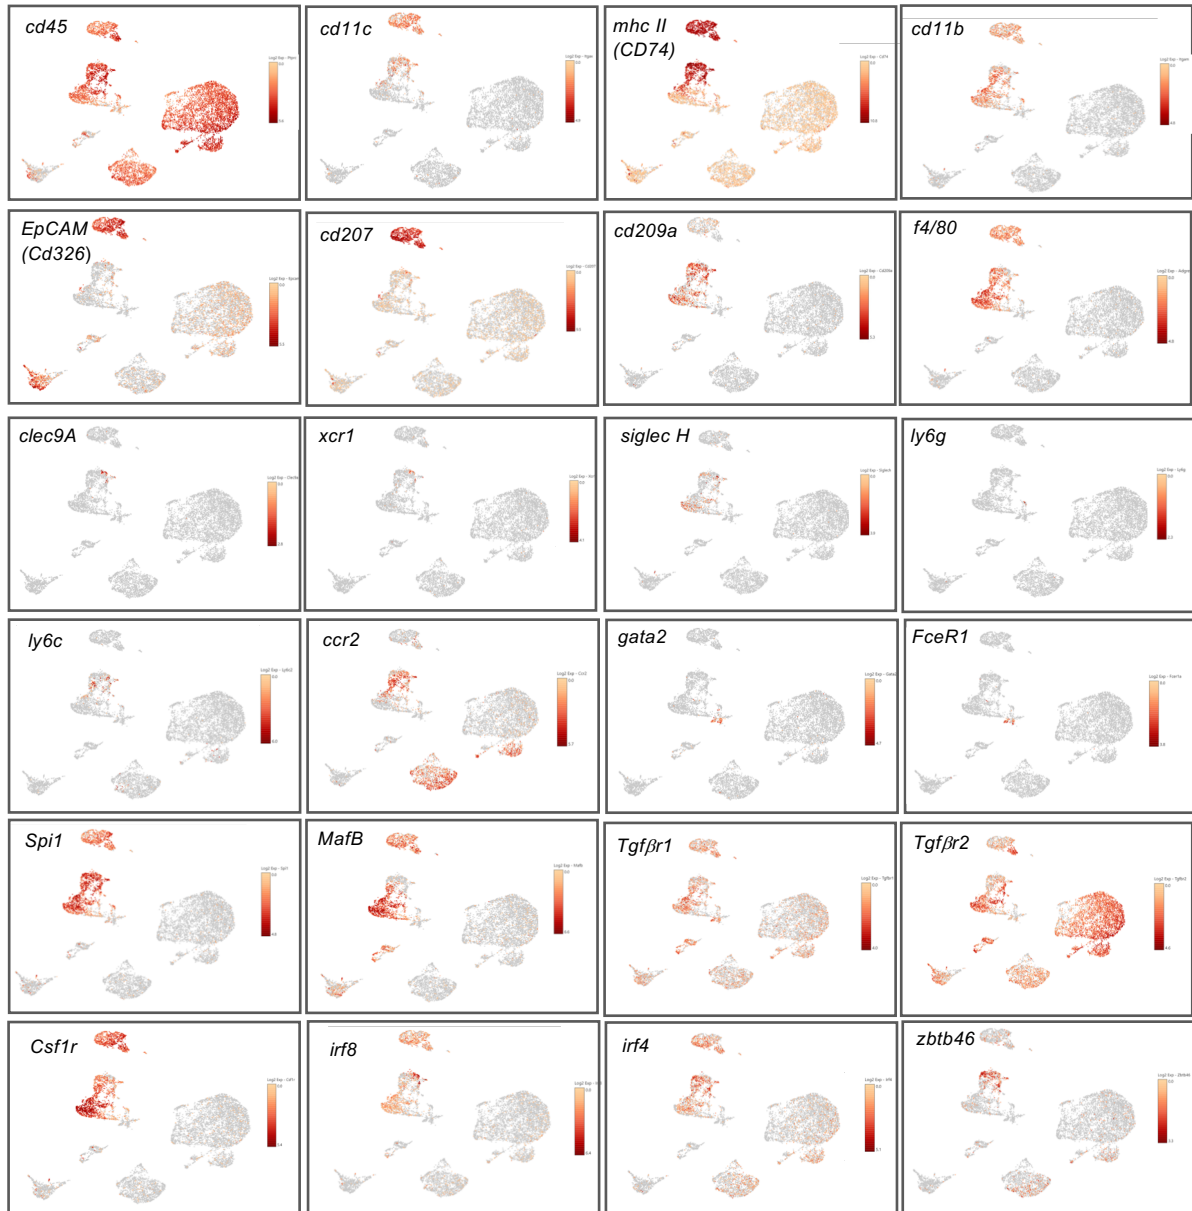

**Fig. S1:** Analysis of scRNAseq data from murine dermis. UMAP plots showing the expression of indicated prototypical myeloid genes.

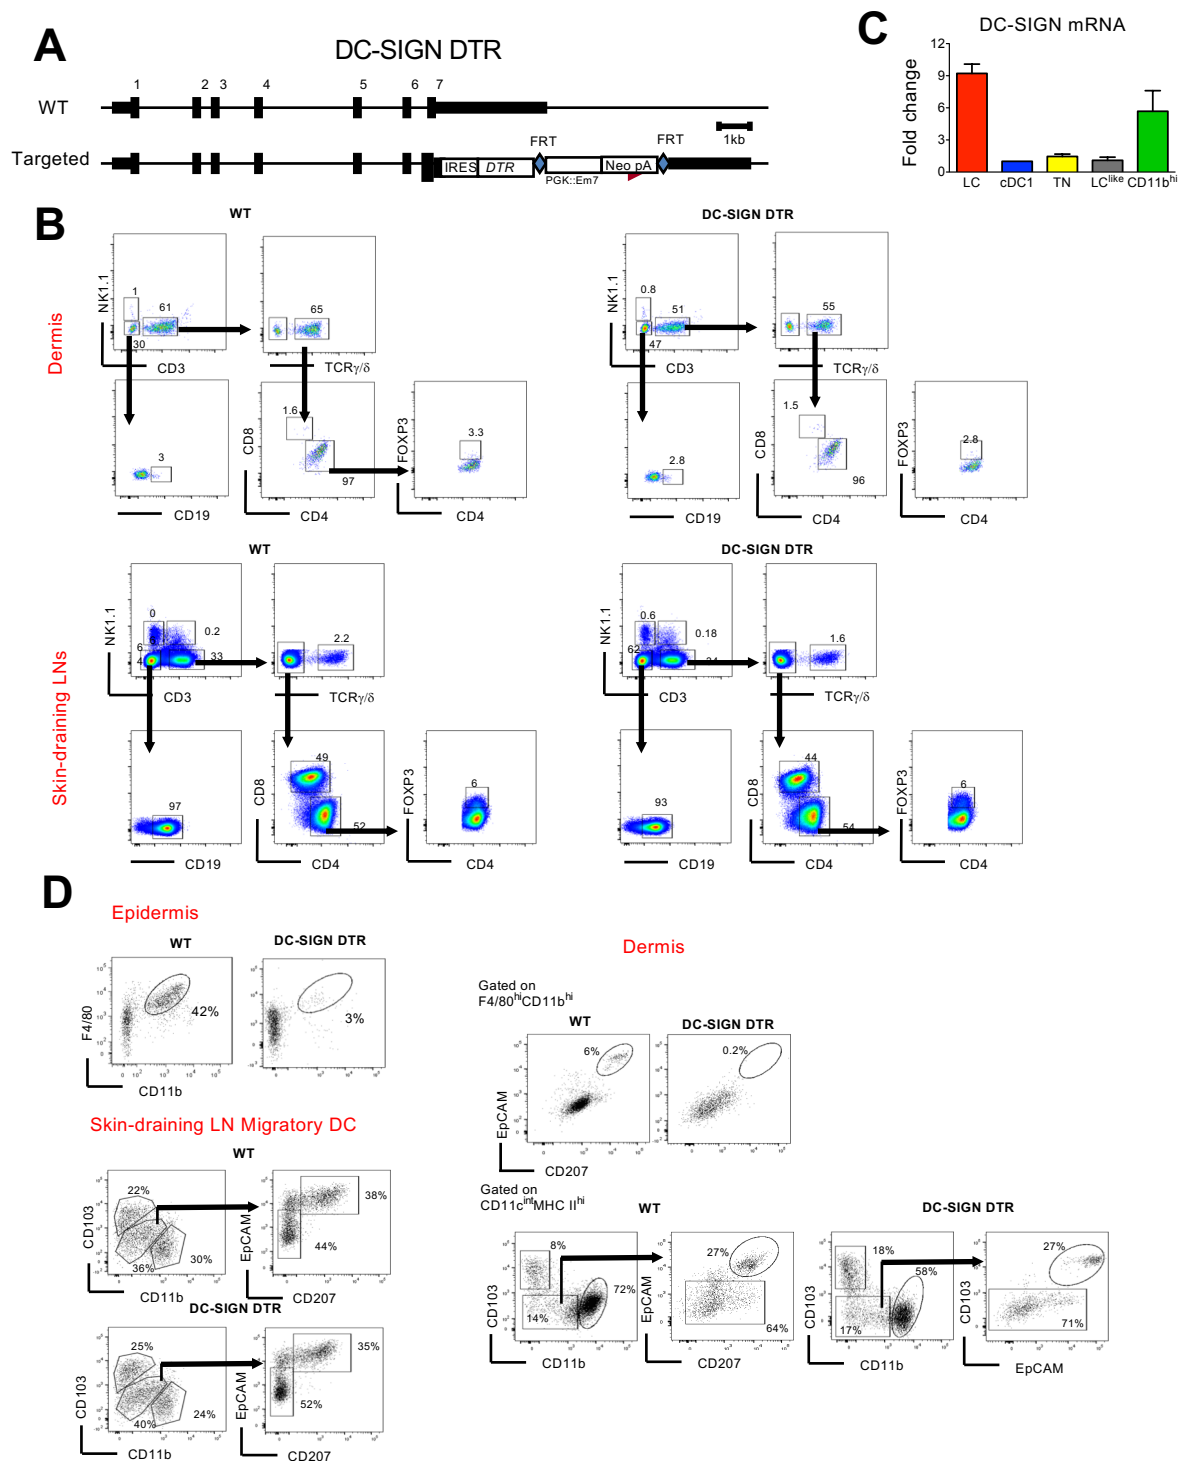

**Fig. S2.** (A) The experimental strategy to generate DC-SIGN-DTR mice. (B) Quantitative PCR analysis of the mRNA expression in epidermal LC and distinct LN DC subpopulations. (C) Lymphoid cell populations in DT-treated WT and DC-SIGN-DTR mice. Upper panel: dermis; lower panel: skin-draining LNs. (D) Representative flow cytometry dot plots of single-cell suspensions from the epidermis (top), dermis (middle) and skin-draining LN (bottom) obtained from DT-injected WT and DC-SIGN-DTR mice following the long-term depletion protocol shown in Fig. 6A.
